# Supplementary material for: Parental Type D Personality and Children’s Hyperactive Behaviors: The Mediating Role of Parent–Child Interactive Activities
Source: MDPI journal article supplement (doi:10.3390/ijerph16071116), 2019-03-28
Supplement: s1 [file s1]

# Parental Type D Personality and Children's Hyperactive Behaviors: The Mediating Role of Parent-Child Interactive Activities

Guan-Hao He, Li Liu, Esben Strodl, Zeng-Liang Ruan, Hui Jiang, Jin Jing, Yu Jin and Wei-Qing Chen

## Regression coefficients after the dependent variable is log-transformed

Log transformation is a useful method to reduce the skewness of the dependent variable in linear regression<sup>1, 2</sup>. Since some HI included zero values, the value of '1' was added to HI score for each child, and then the new score was transformed by natural logarithm (ln) to reduce skewness, when the outcome was the HI score in linear regression. In this case, the partial regression coefficients were used to express the strengths of associations of parental TDP and parent-child interactive activities with children's hyperactive behaviors. Further, the natural log scaled partial coefficient of linear regression can be exponentiated to express the percentage changes of 'HI score + 1' when the scores of parent-child interactive behaviors add one point, or when the mothers/fathers with TDP was compared with mothers/fathers without TDP. For example, in model 1 of Table 3, the 0.111  $\beta$  coefficient of maternal TDP means that mother with TDP can lead to a " $e^{0.111}-1=11.7\%$ " higher in children's HI score, compared to the mother without TDP. The calculation of percentage change from the log scaled partial coefficient is as follows:

$$(1) \ln Y = \beta_0 + \beta_1 X_1 + \beta_2 X_2 + \dots + \beta_k X_k,$$

$$\ln Y' = \beta_0 + \beta_1 (X_1 + 1) + \beta_2 X_2 + \dots + \beta_k X_k;$$

$$(2) \ln Y' - \ln Y = \beta_0 + \beta_1 (X_1 + 1) + \beta_2 X_2 + \dots + \beta_k X_k - (\beta_0 + \beta_1 X_1 + \beta_2 X_2 + \dots + \beta_k X_k) = \beta_1;$$

$$(3) \ln \left( \frac{Y'}{Y} \right) = \beta_1;$$

$$(4) \frac{Y'}{Y} = e^{\beta_1};$$

$$(5) \frac{Y' - Y}{Y} = e^{\beta_1} - 1;$$

$$(6) \text{Percentage change of } Y = e^{\beta_1} - 1;$$

In addition, Table S2 presents the  $\beta$  coefficients and its corresponding "percentage changes" in the linear regression concerning associations of parental TDP and parent-child interactive activities with children's hyperactive behaviors. In this linear regression, parental TDP and parent-child interactive activities were independent variables, while the HI scores after logarithm transformation was dependent variable.

**Table S1.** Associations between parental TDP and parent-child interactive activities.

| Variable                          | Parent-child interactive activities at 0 to 1 year |                          |                          |                          |
|-----------------------------------|----------------------------------------------------|--------------------------|--------------------------|--------------------------|
|                                   | Singing                                            | Chatting                 | Playing                  | Outdoor Activity         |
| Maternal TDP                      |                                                    |                          |                          |                          |
| No                                | Ref                                                | Ref                      | Ref                      | Ref                      |
| Yes                               | -0.291(-0.323,-0.259) ***                          | -0.185 (-0.211,0.160)*** | -0.281(-0.310,-0.252)*** | -0.155(-0.182,-0.128)*** |
| Paternal TDP                      |                                                    |                          |                          |                          |
| No                                | Ref                                                | Ref                      | Ref                      | Ref                      |
| Yes                               | -0.233(-0.269,-0.198)***                           | -0.168(-0.197,-0.140)*** | -0.236(-0.268,-0.204)*** | -0.130(-0.160,-0.101)*** |
| Combined parental TDP             |                                                    |                          |                          |                          |
| Non-TDP mother and non-TDP father | Ref                                                | Ref                      | Ref                      | Ref                      |
| TDP mother TDP and non-TDP father | -0.268(-0.309,-0.227)***                           | -0.130(-0.163,-0.097)*** | -0.237(-0.274,-0.200)*** | -0.135(-0.170,-0.101)*** |
| Non-TDP mother and TDP father     | -0.158(-0.208,-0.109)***                           | -0.078(-0.118,-0.038)*** | -0.141(-0.186,-0.097)*** | -0.086(-0.127,-0.044)*** |
| TDP mother and TDP father         | -0.344(-0.392,-0.295)***                           | -0.273(-0.311,-0.234)*** | -0.360(-0.404,-0.317)*** | -0.193(-0.233,-0.153)*** |

| Variable                          | Parent-child interactive activities at 1 to 3 years |                          |                          |                          |                          |                          |
|-----------------------------------|-----------------------------------------------------|--------------------------|--------------------------|--------------------------|--------------------------|--------------------------|
|                                   | Reading                                             | Singing                  | Chatting                 | Playing                  | Gatherings <sup>a</sup>  | Outdoor Activity         |
| Maternal TDP                      |                                                     |                          |                          |                          |                          |                          |
| No                                | Ref                                                 | Ref                      | Ref                      | Ref                      | Ref                      | Ref                      |
| Yes                               | -0.257(-0.287,-0.227)***                            | -0.278(-0.308,-0.249)*** | -0.184(-0.206,-0.162)*** | -0.275(-0.303,-0.248)*** | -0.179(-0.206,-0.152)*** | -0.186(-0.216,-0.155)*** |
| Paternal TDP                      |                                                     |                          |                          |                          |                          |                          |
| No                                | Ref                                                 | Ref                      | Ref                      | Ref                      | Ref                      | Ref                      |
| Yes                               | -0.224(-0.257,-0.191)***                            | -0.224(-0.256,-0.192)*** | -0.167(-0.192,-0.143)*** | -0.231(-0.262,-0.201)*** | -0.133(-0.163,-0.104)*** | -0.124(-0.157,-0.090)*** |
| Combined parental TDP             |                                                     |                          |                          |                          |                          |                          |
| Non-TDP mother and non-TDP father | Ref                                                 | Ref                      | Ref                      | Ref                      | Ref                      | Ref                      |
| TDP mother TDP and non-TDP father | -0.240(-0.278,-0.202)***                            | -0.269(-0.306,-0.232)*** | -0.120(-0.149,-0.092)*** | -0.248(-0.283,-0.213)*** | -0.230(-0.265,-0.196)*** | -0.194(-0.233,-0.155)*** |
| Non-TDP mother and TDP father     | -0.178(-0.224,-0.133)***                            | -0.172(-0.217,-0.127)*** | -0.065(-0.099,-0.030)*** | -0.161(-0.204,-0.119)*** | -0.174(-0.216,-0.133)*** | -0.089(-0.135,-0.042)*** |
| TDP mother and TDP father         | -0.302(-0.347,-0.258)***                            | -0.313(-0.357,-0.269)*** | -0.282(-0.315,-0.248)*** | -0.334(-0.375,-0.293)*** | -0.129(-0.169,-0.088)*** | -0.185(-0.231,-0.140)*** |

Adjusted for gender, child's age, child's migrant status, marital status, maternal age, maternal education, paternal age, paternal education.

\* P<0.05 \*\* P<0.01 \*\*\* P<0.001

<sup>a</sup> Gatherings refer to joining family and friends gatherings with child

Abbreviation: TDP: type D personality.

**Table S2.** Associations of parental TDP and parent-child interactive activities with children's hyperactive behaviors.

| Variables                                         | Hyperactive behaviors    |                                           |                        |
|---------------------------------------------------|--------------------------|-------------------------------------------|------------------------|
|                                                   | Continuous Measure       |                                           | Dichotomous Measure    |
|                                                   | $\beta$ (95% CI)         | Percentage change in score, %<br>(95% CI) | OR (95% CI)            |
| Maternal TDP                                      |                          |                                           |                        |
| No                                                | Ref                      | Ref                                       | Ref                    |
| Yes                                               | 0.111(0.104,0.118)***    | 11.7 (11.0,12.5)***                       | 2.288(2.136,2.450)***  |
| Paternal TDP                                      |                          |                                           |                        |
| No                                                | Ref                      | Ref                                       | Ref                    |
| Yes                                               | 0.097(0.090,0.105)***    | 10.2 (9.4,11.1)***                        | 2.081(1.929,2.245)***  |
| Combined parental TDP                             |                          |                                           |                        |
| Non-TDP mother and non-TDP father                 | Ref                      | Ref                                       | Ref                    |
| TDP mother and non-TDP father                     | 0.117(0.108,0.126)***    | 12.4(11.4,13.4)***                        | 2.245(2.056,2.451)***  |
| Non-TDP mother and TDP father                     | 0.098(0.087,0.108)***    | 10.3(9.1,11.4)***                         | 1.918(1.718,2.141)***  |
| TDP mother and TDP father                         | 0.114(0.104,0.124)***    | 12.1(11.0,13.2)***                        | 2.593(2.348,2.863)***  |
| Parent-child interactive activity at 0 to 1 year  |                          |                                           |                        |
| Singing                                           | -0.002(-0.004,-0.001)*   | -0.2 (-0.4,-0.1)*                         | 0.953(0.931,0.975)***  |
| Chatting                                          | 0.001(-0.002,0.003)      | 0.1 (-0.2,0.3)                            | 0.946(0.921,0.973)***  |
| Playing                                           | -0.016(-0.018,-0.014)*** | -1.6 (-1.8,-1.4)***                       | 0.867(0.846,0.888)***  |
| Outdoor Activity                                  | -0.001(-0.003,0.001)     | -0.1 (-0.3,0.1)                           | 0.973(0.947,0.999)*    |
| Interactive Index                                 | -0.009(-0.012,-0.006)*** | -0.9 (-1.2,-0.6)***                       | 0.885(0.857,0.915)***  |
| Parent-child interactive activity at 1 to 3 years |                          |                                           |                        |
| Reading                                           | -0.023(-0.025,-0.021)*** | -2.3 (-2.5,-2.1)***                       | 0.840 (0.820,0.861)*** |
| Singing                                           | -0.012(-0.014,-0.010)*** | -1.2 (-1.4,-1.0)***                       | 0.902 (0.880,0.925)*** |
| Chatting                                          | -0.004(-0.007,-0.002)**  | -0.4 (-0.7,-0.2)**                        | 0.899(0.872,0.927)***  |
| Playing                                           | -0.024(-0.026,-0.022)*** | -2.4 (-2.6,-2.2)***                       | 0.823 (0.803,0.845)*** |
| Gatherings <sup>a</sup>                           | -0.034(-0.036,-0.032)*** | -3.3 (-3.5,-3.1)***                       | 0.809 (0.786,0.832)*** |
| Outdoor Activity                                  | -0.003(-0.005,-0.001)*** | -0.3 (-0.5,-0.1)***                       | 0.964(0.941,0.987)**   |
| Interactive Index                                 | -0.037(-0.041,-0.034)*** | -3.6 (-4.0,-3.3)***                       | 0.746(0.718,0.775)***  |

Adjusted for gender, child's age, child's migrant status, marital status, maternal age, maternal education, paternal age, paternal education.

\* P<0.05 \*\* P<0.01 \*\*\* P<0.001

<sup>a</sup> Gatherings refer to joining family and friends gatherings with child.

Abbreviation: TDP: type D personality; Ref: reference group.

**Table S3.** Mediation effect of parent-child interactive activities on the associations between parental TDP and children's hyperactive behaviors.

| Characteristics                                 | Hyperactive behaviors (Dependent variable, Y, $\beta$ /OR, 95% CI) |                          |                            |
|-------------------------------------------------|--------------------------------------------------------------------|--------------------------|----------------------------|
|                                                 | Model 1<br>X→Y                                                     | Model 2<br>X+M→Y         | Proportion of<br>Mediation |
| Y taken as a continuous variable                |                                                                    |                          |                            |
| Parent-child interactive activities at 0-1 year |                                                                    |                          |                            |
| Maternal TDP (Independent Variable, X)          | 0.111(0.104,0.118)***                                              | 0.111(0.104,0.118)***    | NS                         |
| Singing (Mediator, M)                           | ---                                                                | 0.000(-0.002,0.002)      |                            |
| Maternal TDP (Independent Variable, X)          | 0.111(0.104,0.118)***                                              | 0.111(0.105,0.118)***    | NS                         |
| Chatting (Mediator, M)                          | ---                                                                | 0.003(-0.001,0.005)      |                            |
| Maternal TDP (Independent Variable, X)          | 0.111(0.104,0.118)***                                              | 0.107(0.100,0.114)***    | 3.3%                       |
| Playing (Mediator, M)                           | ---                                                                | -0.013(-0.015,-0.011)*** |                            |
| Maternal TDP (Independent Variable, X)          | 0.111(0.104,0.118)***                                              | 0.111(0.104,0.118)***    | NS                         |
| Outdoor Activity (Mediator, M)                  | ---                                                                | 0.001(-0.002,0.003)      |                            |
| Paternal TDP (Independent Variable, X)          | 0.097(0.090,0.105)***                                              | 0.097(0.089,0.104)***    | NS                         |
| Singing (Mediator, M)                           | ---                                                                | -0.001(-0.003,0.001)     |                            |
| Paternal TDP (Independent Variable, X)          | 0.097(0.090,0.105)***                                              | 0.097(0.090,0.105)***    | NS                         |
| Chatting (Mediator, M)                          | ---                                                                | 0.002(-0.000,0.005)      |                            |
| Paternal TDP (Independent Variable, X)          | 0.097(0.090,0.105)***                                              | 0.094(0.086,0.101)***    | 3.4%                       |
| Playing (Mediator, M)                           | ---                                                                | -0.014(-0.016,-0.012)*** |                            |
| Paternal TDP (Independent Variable, X)          | 0.097(0.090,0.105)***                                              | 0.097(0.090,0.105)***    | NS                         |
| Outdoor Activity (Mediator, M)                  | ---                                                                | -0.000(-0.003,0.002)     |                            |
| Combined parental TDP (Independent Variable, X) |                                                                    |                          |                            |
| TDP mother and non-TDP father (D <sub>1</sub> ) | 0.117(0.108,0.126)***                                              | 0.117(0.109,0.126)***    | NS                         |
| Non-TDP mother and TDP father (D <sub>2</sub> ) | 0.098(0.087,0.108)***                                              | 0.098(0.087,0.108)***    | NS                         |
| TDP mother and TDP father (D <sub>3</sub> )     | 0.114(0.104,0.124)***                                              | 0.114(0.104,0.124)***    | NS                         |
| Singing (Mediator, M)                           |                                                                    | 0.001(-0.001,0.002)      |                            |
| Combined parental TDP (Independent Variable, X) |                                                                    |                          |                            |
| TDP mother and non-TDP father (D <sub>1</sub> ) | 0.117(0.108,0.126)***                                              | 0.117(0.109,0.126)***    | 0.3%                       |
| Non-TDP mother and TDP father (D <sub>2</sub> ) | 0.098(0.087,0.108)***                                              | 0.098(0.087,0.108)***    | 0.2%                       |
| TDP mother and TDP father (D <sub>3</sub> )     | 0.114(0.104,0.124)***                                              | 0.114(0.105,0.125)***    | 0.7%                       |
| Chatting (Mediator, M)                          |                                                                    | -0.003(-0.001,-0.006)**  |                            |
| Combined parental TDP (Independent Variable, X) |                                                                    |                          |                            |
| TDP mother and non-TDP father (D <sub>1</sub> ) | 0.117(0.108,0.126)***                                              | 0.114(0.105,0.123)***    | 2.6%                       |
| Non-TDP mother and TDP father (D <sub>2</sub> ) | 0.098(0.087,0.108)***                                              | 0.096(0.085,0.106)***    | 1.9%                       |
| TDP mother and TDP father (D <sub>3</sub> )     | 0.114(0.104,0.124)***                                              | 0.109(0.099,0.120)***    | 4.1%                       |
| Playing (Mediator, M)                           |                                                                    | -0.013(-0.015,-0.011)*** |                            |
| Combined parental TDP (Independent Variable, X) |                                                                    |                          |                            |
| TDP mother and non-TDP father (D <sub>1</sub> ) | 0.117(0.108,0.126)***                                              | 0.117(0.109,0.126)***    | NS                         |
| Non-TDP mother and TDP father (D <sub>2</sub> ) | 0.098(0.087,0.108)***                                              | 0.098(0.087,0.108)***    | NS                         |
| TDP mother and TDP father (D <sub>3</sub> )     | 0.114(0.104,0.124)***                                              | 0.114(0.104,0.124)***    | NS                         |
| Outdoor Activity (Mediator, M)                  |                                                                    | 0.001(-0.001,0.003)      |                            |

Table S3. *Cont.*

| Characteristics                                        | Hyperactive behaviors (Dependent variable, Y, $\beta$ /OR, 95% CI) |                          |                            |
|--------------------------------------------------------|--------------------------------------------------------------------|--------------------------|----------------------------|
|                                                        | Model 1<br>X→Y                                                     | Model 2<br>X+M→Y         | Proportion of<br>Mediation |
| <b>Parent-child interactive activities at 1-3 year</b> |                                                                    |                          |                            |
| Maternal TDP (Independent Variable, X)                 | 0.111(0.104,0.118)***                                              | 0.106(0.099,0.112)***    | 4.6%                       |
| Reading (Mediator, M)                                  | ---                                                                | -0.020(-0.022,-0.018)*** |                            |
| Maternal TDP (Independent Variable, X)                 | 0.111(0.104,0.118)***                                              | 0.108(0.101,0.115)***    | 2.3%                       |
| Singing (Mediator, M)                                  | ---                                                                | -0.009(-0.011,-0.007)*** |                            |
| Maternal TDP (Independent Variable, X)                 | 0.111(0.104,0.118)***                                              | 0.111(0.104,0.117)***    | NS                         |
| Chatting (Mediator, M)                                 | ---                                                                | -0.001(-0.004,0.002)     |                            |
| Maternal TDP (Independent Variable, X)                 | 0.111(0.104,0.118)***                                              | 0.105(0.098,0.112)***    | 5.2%                       |
| Playing (Mediator, M)                                  | ---                                                                | -0.021(-0.023,-0.018)*** |                            |
| Maternal TDP (Independent Variable, X)                 | 0.111(0.104,0.118)***                                              | 0.105(0.098,0.112)***    | 5.2%                       |
| Gatherings <sup>a</sup> (Mediator, M)                  | ---                                                                | -0.032(-0.034,-0.030)*** |                            |
| Maternal TDP (Independent Variable, X)                 | 0.111(0.104,0.118)***                                              | 0.111(0.104,0.117)***    | NS                         |
| Outdoor Activity (Mediator, M)                         | ---                                                                | -0.002(-0.004,0.000)     |                            |
| Paternal TDP (Independent Variable, X)                 | 0.097(0.090,0.105)***                                              | 0.092(0.085,0.100)***    | 4.9%                       |
| Reading (Mediator, M)                                  | ---                                                                | -0.021(-0.023,-0.019)*** |                            |
| Paternal TDP (Independent Variable, X)                 | 0.097(0.090,0.105)***                                              | 0.095(0.087,0.102)***    | 2.3%                       |
| Singing (Mediator, M)                                  | ---                                                                | -0.010(-0.012,-0.008)*** |                            |
| Paternal TDP (Independent Variable, X)                 | 0.097(0.090,0.105)***                                              | 0.097(0.089,0.104)***    | NS                         |
| Chatting (Mediator, M)                                 | ---                                                                | -0.002(-0.005,0.001)     |                            |
| Paternal TDP (Independent Variable, X)                 | 0.097(0.090,0.105)***                                              | 0.092(0.085,0.100)***    | 5.2%                       |
| Playing (Mediator, M)                                  | ---                                                                | -0.022(-0.024,-0.020)*** |                            |
| Paternal TDP (Independent Variable, X)                 | 0.097 (0.090,0.105)***                                             | 0.093(0.085,0.100)***    | 4.5%                       |
| Gatherings <sup>a</sup> (Mediator, M)                  | ---                                                                | -0.033(-0.035,-0.031)*** |                            |
| Paternal TDP (Independent Variable, X)                 | 0.097 (0.090,0.105)***                                             | 0.097(0.089,0.104)***    | 0.4%                       |
| Outdoor Activity (Mediator, M)                         | ---                                                                | -0.003(-0.005,-0.001)*   |                            |
| Combined parental TDP (Independent Variable, X)        |                                                                    |                          |                            |
| TDP mother and non-TDP father (D <sub>1</sub> )        | 0.117(0.108,0.126)***                                              | 0.112(0.104,0.121)***    | 4.1%                       |
| Non-TDP mother and TDP father (D <sub>2</sub> )        | 0.098(0.087,0.108)***                                              | 0.094(0.084,0.104)***    | 3.6%                       |
| TDP mother and TDP father (D <sub>3</sub> )            | 0.114(0.104,0.124)***                                              | 0.108(0.098,0.118)***    | 5.3%                       |
| Reading (Mediator, M)                                  |                                                                    | -0.020(-0.022,-0.018)*** |                            |
| Combined parental TDP (Independent Variable, X)        |                                                                    |                          |                            |
| TDP mother and non-TDP father (D <sub>1</sub> )        | 0.117(0.108,0.126)***                                              | 0.115(0.106,0.124)***    | 1.8%                       |
| Non-TDP mother and TDP father (D <sub>2</sub> )        | 0.098(0.087,0.108)***                                              | 0.096(0.086,0.107)***    | 1.4%                       |
| TDP mother and TDP father (D <sub>3</sub> )            | 0.114(0.104,0.124)***                                              | 0.111(0.101,0.122)***    | 2.2%                       |
| Singing (Mediator, M)                                  |                                                                    | -0.008(-0.010,-0.006)*** |                            |

Table S3. *Cont.*

| Characteristics                                        | Hyperactive behaviors (Dependent variable, Y, $\beta$ /OR, 95% CI) |                          |                            |
|--------------------------------------------------------|--------------------------------------------------------------------|--------------------------|----------------------------|
|                                                        | Model 1<br>X→Y                                                     | Model 2<br>X+M→Y         | Proportion of<br>Mediation |
| Combined parental TDP (Independent Variable, X)        |                                                                    |                          |                            |
| TDP mother and non-TDP father (D <sub>1</sub> )        | 0.117(0.108,0.126)***                                              | 0.117(0.108,0.126)***    | NS                         |
| Non-TDP mother and TDP father (D <sub>2</sub> )        | 0.098(0.087,0.108)***                                              | 0.098(0.087,0.108)***    | NS                         |
| TDP mother and TDP father (D <sub>3</sub> )            | 0.114(0.104,0.124)***                                              | 0.114(0.104,0.124)***    | NS                         |
| Chatting (Mediator, M)                                 |                                                                    | -0.001(-0.003,0.002)     |                            |
| Combined parental TDP (Independent Variable, X)        |                                                                    |                          |                            |
| TDP mother and non-TDP father (D <sub>1</sub> )        | 0.117(0.108,0.126)***                                              | 0.112(0.104,0.121)***    | 4.2%                       |
| Non-TDP mother and TDP father (D <sub>2</sub> )        | 0.098(0.087,0.108)***                                              | 0.094(0.084,0.105)***    | 3.3%                       |
| TDP mother and TDP father (D <sub>3</sub> )            | 0.114(0.104,0.124)***                                              | 0.107(0.097,0.118)***    | 5.9%                       |
| Playing (Mediator, M)                                  |                                                                    | -0.020(-0.022,-0.018)*** |                            |
| Combined parental TDP (Independent Variable, X)        |                                                                    |                          |                            |
| TDP mother and non-TDP father (D <sub>1</sub> )        | 0.117(0.108,0.126)***                                              | 0.110(0.101,0.119)***    | 6.1%                       |
| Non-TDP mother and TDP father (D <sub>2</sub> )        | 0.098(0.087,0.108)***                                              | 0.092(0.082,0.102)***    | 5.5%                       |
| TDP mother and TDP father (D <sub>3</sub> )            | 0.114(0.104,0.124)***                                              | 0.110(0.100,0.120)***    | 3.5%                       |
| Gatherings <sup>a</sup> (Mediator, M)                  |                                                                    | -0.031(-0.034,-0.029)*** |                            |
| Combined parental TDP (Independent Variable, X)        |                                                                    |                          |                            |
| TDP mother and non-TDP father (D <sub>1</sub> )        | 0.117(0.108,0.126)***                                              | 0.117(0.108,0.126)***    | NS                         |
| Non-TDP mother and TDP father (D <sub>2</sub> )        | 0.098(0.087,0.108)***                                              | 0.097(0.087,0.108)***    | NS                         |
| TDP mother and TDP father (D <sub>3</sub> )            | 0.114(0.104,0.124)***                                              | 0.114(0.104,0.124)***    | NS                         |
| Outdoor Activity (Mediator, M)                         |                                                                    | -0.001(-0.003,0.001)     | NS                         |
| <b>Y taken as a dichotomous variable</b>               |                                                                    |                          |                            |
| <b>Parent-child interactive activities at 0-1 year</b> |                                                                    |                          |                            |
| Maternal TDP (Independent Variable, X)                 | 2.288(2.136,2.450)***                                              | 2.271(2.119,2.433)***    | 1.3%                       |
| Singing (Mediator, M)                                  | ---                                                                | 0.974 (0.952,0.997)*     |                            |
| Maternal TDP (Independent Variable, X)                 | 2.288(2.136,2.450)***                                              | 2.274(2.122,2.436)***    | 1.1%                       |
| Chatting (Mediator, M)                                 | ---                                                                | 0.967 (0.941,0.995)*     |                            |
| Maternal TDP (Independent Variable, X)                 | 2.288(2.136,2.450)***                                              | 2.215(2.067,2.373)***    | 5.8%                       |
| Playing (Mediator, M)                                  | ---                                                                | 0.888(0.867,0.911)***    |                            |
| Maternal TDP (Independent Variable, X)                 | 2.288(2.136,2.450)***                                              | 2.284(2.132,2.446)***    | NS                         |
| Outdoor Activity (Mediator, M)                         | ---                                                                | 0.989(0.963,1.017)       |                            |
| Paternal TDP (Independent Variable, X)                 | 2.081(1.929,2.245)***                                              | 2.064(1.913,2.227)***    | 1.6%                       |
| Singing (Mediator, M)                                  | ---                                                                | 0.965(0.943,0.988)**     |                            |
| Paternal TDP (Independent Variable, X)                 | 2.081(1.929,2.245)***                                              | 2.067(1.915,2.230)***    | 1.3%                       |
| Chatting (Mediator, M)                                 | ---                                                                | 0.960(0.933,0.987)**     |                            |
| Paternal TDP (Independent Variable, X)                 | 2.081(1.929,2.245)***                                              | 2.022(1.874,2.182)***    | 5.7%                       |
| Playing (Mediator, M)                                  | ---                                                                | 0.880(0.859,0.902)***    |                            |
| Paternal TDP (Independent Variable, X)                 | 2.081(1.929,2.245)***                                              | 2.076(1.924,2.240)***    | NS                         |
| Outdoor Activity (Mediator, M)                         | ---                                                                | 0.982(0.956,1.009)       |                            |

Table S3. *Cont.*

| Characteristics                                        | Hyperactive behaviors (Dependent variable, Y, $\beta$ /OR, 95% CI) |                                |                            |
|--------------------------------------------------------|--------------------------------------------------------------------|--------------------------------|----------------------------|
|                                                        | Model 1<br>X $\rightarrow$ Y                                       | Model 2<br>X+M $\rightarrow$ Y | Proportion of<br>Mediation |
| Combined parental TDP (Independent Variable, X)        |                                                                    |                                |                            |
| TDP mother and non-TDP father (D <sub>1</sub> )        | 2.245(2.056,2.451)***                                              | 2.232(2.044,2.438)***          | NS                         |
| Non-TDP mother and TDP father (D <sub>2</sub> )        | 1.918(1.718,2.141)***                                              | 1.911(1.712,2.134)***          | NS                         |
| TDP mother and TDP father (D <sub>3</sub> )            | 2.593(2.348,2.863)***                                              | 2.574(2.330,2.843)***          | NS                         |
| Singing (Mediator, M)                                  |                                                                    | 0.978(0.956,1.001)             |                            |
| Combined parental TDP (Independent Variable, X)        |                                                                    |                                |                            |
| TDP mother and non-TDP father (D <sub>1</sub> )        | 2.245(2.056,2.451)***                                              | 2.236(2.048,2.442)***          | 0.7%                       |
| Non-TDP mother and TDP father (D <sub>2</sub> )        | 1.918(1.718,2.141)***                                              | 1.914(1.714,2.136)***          | 0.5%                       |
| TDP mother and TDP father (D <sub>3</sub> )            | 2.593(2.348,2.863)***                                              | 2.572(2.328,2.841)***          | 1.3%                       |
| Chatting (Mediator, M)                                 |                                                                    | 0.971(0.944,0.998)*            |                            |
| Combined parental TDP (Independent Variable, X)        |                                                                    |                                |                            |
| TDP mother and non-TDP father (D <sub>1</sub> )        | 2.245(2.056,2.451)***                                              | 2.186(2.002,2.388)***          | 4.8%                       |
| Non-TDP mother and TDP father (D <sub>2</sub> )        | 1.918(1.718,2.141)***                                              | 1.889(1.692,2.109)***          | 3.3%                       |
| TDP mother and TDP father (D <sub>3</sub> )            | 2.593(2.348,2.863)***                                              | 2.492(2.256,2.754)***          | 6.5%                       |
| Playing (Mediator, M)                                  |                                                                    | 0.892(0.871,0.914)***          |                            |
| Combined parental TDP (Independent Variable, X)        |                                                                    |                                |                            |
| TDP mother and non-TDP father (D <sub>1</sub> )        | 2.245(2.056,2.451)***                                              | 2.243(2.054,2.449)***          | NS                         |
| Non-TDP mother and TDP father (D <sub>2</sub> )        | 1.918(1.718,2.141)***                                              | 1.916(1.717,2.140)***          | NS                         |
| TDP mother and TDP father (D <sub>3</sub> )            | 2.593(2.348,2.863)***                                              | 2.589(2.344,2.860)***          | NS                         |
| Outdoor Activity (Mediator, M)                         |                                                                    | 0.992(0.966,1.020)             |                            |
| <b>Parent-child interactive activities at 1-3 year</b> |                                                                    |                                |                            |
| Maternal TDP (Independent Variable, X)                 | 2.288(2.136,2.450)***                                              | 2.205(2.058,2.363)***          | 6.8%                       |
| Reading (Mediator, M)                                  | ---                                                                | 0.859(0.838,0.880)***          |                            |
| Maternal TDP (Independent Variable, X)                 | 2.288(2.136,2.450)***                                              | 2.241(2.091,2.401)***          | 3.8%                       |
| Singing (Mediator, M)                                  | ---                                                                | 0.925(0.902,0.948)***          |                            |
| Maternal TDP (Independent Variable, X)                 | 2.288(2.136,2.450)***                                              | 2.255(2.105,2.416)***          | 2.6%                       |
| Chatting (Mediator, M)                                 | ---                                                                | 0.924(0.896,0.954)***          |                            |
| Maternal TDP (Independent Variable, X)                 | 2.288(2.136,2.450)***                                              | 2.189(2.043,2.346)***          | 8.1%                       |
| Playing (Mediator, M)                                  | ---                                                                | 0.844(0.823,0.866)***          |                            |
| Maternal TDP (Independent Variable, X)                 | 2.288(2.136,2.450)***                                              | 2.219(2.071,2.377)***          | 6.0%                       |
| Gatherings <sup>a</sup> (Mediator, M)                  | ---                                                                | 0.824(0.801,0.849)***          |                            |
| Maternal TDP (Independent Variable, X)                 | 2.288(2.136,2.450)***                                              | 2.279(2.127,2.441)***          | NS                         |
| Outdoor Activity (Mediator, M)                         | ---                                                                | 0.980(0.956,1.004)             |                            |
| Paternal TDP (Independent Variable, X)                 | 2.081(1.929,2.245)***                                              | 2.012(1.865,2.172)***          | 6.8%                       |
| Reading (Mediator, M)                                  | ---                                                                | 0.852(0.831,0.873)***          |                            |
| Paternal TDP (Independent Variable, X)                 | 2.081(1.929,2.245)***                                              | 2.042(1.892,2.203)***          | 3.8%                       |
| Singing (Mediator, M)                                  | ---                                                                | 0.915(0.893,0.938)***          |                            |
| Paternal TDP (Independent Variable, X)                 | 2.081(1.929,2.245)***                                              | 2.050(1.900,2.212)***          | 2.8%                       |
| Chatting (Mediator, M)                                 | ---                                                                | 0.916(0.887,0.945)***          |                            |
| Paternal TDP (Independent Variable, X)                 | 2.081(1.929,2.245)***                                              | 2.001(1.854,2.160)***          | 7.8%                       |
| Playing (Mediator, M)                                  | ---                                                                | 0.836(0.815,0.858)***          |                            |

Table S3. *Cont.*

| Characteristics                                                                      | Hyperactive behaviors (Dependent variable, Y, $\beta$ /OR, 95% CI) |                                                |                            |
|--------------------------------------------------------------------------------------|--------------------------------------------------------------------|------------------------------------------------|----------------------------|
|                                                                                      | Model 1<br>X $\rightarrow$ Y                                       | Model 2<br>X+M $\rightarrow$ Y                 | Proportion of<br>Mediation |
| Paternal TDP (Independent Variable, X)<br>Gatherings <sup>a</sup> (Mediator, M)      | 2.081(1.929,2.245)***<br>---                                       | 2.034(1.885,2.195)***<br>0.817(0.793,0.841)*** | 5.1%                       |
| Paternal TDP (Independent Variable, X)<br>Outdoor Activity (Mediator, M)             | 2.081(1.929,2.245)***<br>---                                       | 2.073(1.922,2.237)***<br>0.971(0.948,0.994)*   | 0.7%                       |
| Combined parental TDP (Independent Variable,<br>X)                                   |                                                                    |                                                |                            |
| TDP mother and non-TDP father (D <sub>1</sub> )                                      | 2.245(2.056,2.451)***                                              | 2.172(1.988,2.372)***                          | 6.3%                       |
| Non-TDP mother and TDP father (D <sub>2</sub> )                                      | 1.918(1.718,2.141)***                                              | 1.872(1.676,2.090)***                          | 5.4%                       |
| TDP mother and TDP father (D <sub>3</sub> )<br>Reading (Mediator, M)                 | 2.593(2.348,2.863)***                                              | 2.486(2.250,2.747)***<br>0.863(0.842,0.885)*** | 7.1%                       |
| Combined parental TDP (Independent Variable,<br>X)                                   |                                                                    |                                                |                            |
| TDP mother and non-TDP father (D <sub>1</sub> )                                      | 2.245(2.056,2.451)***                                              | 2.203(2.018,2.406)***                          | 3.6%                       |
| Non-TDP mother and TDP father (D <sub>2</sub> )                                      | 1.918(1.718,2.141)***                                              | 1.894(1.697,2.115)***                          | 2.6%                       |
| TDP mother and TDP father (D <sub>3</sub> )<br>Singing (Mediator, M)                 | 2.593(2.348,2.863)***                                              | 2.536(2.296,2.802)***<br>0.929(0.906,0.953)*** | 3.7%                       |
| Combined parental TDP (Independent Variable,<br>X)                                   |                                                                    |                                                |                            |
| TDP mother and non-TDP father (D <sub>1</sub> )                                      | 2.245(2.056,2.451)***                                              | 2.225(2.038,2.430)***                          | 1.6%                       |
| Non-TDP mother and TDP father (D <sub>2</sub> )                                      | 1.918(1.718,2.141)***                                              | 1.909(1.710,2.131)***                          | 1.0%                       |
| TDP mother and TDP father (D <sub>3</sub> )<br>Chatting (Mediator, M)                | 2.593(2.348,2.863)***                                              | 2.539(2.298,2.805)***<br>0.928(0.899,0.958)*** | 3.4%                       |
| Combined parental TDP (Independent Variable,<br>X)                                   |                                                                    |                                                |                            |
| TDP mother and non-TDP father (D <sub>1</sub> )                                      | 2.245(2.056,2.451)***                                              | 2.160(1.978,2.359)***                          | 7.2%                       |
| Non-TDP mother and TDP father (D <sub>2</sub> )                                      | 1.918(1.718,2.141)***                                              | 1.871(1.676,2.090)***                          | 5.4%                       |
| TDP mother and TDP father (D <sub>3</sub> )<br>Playing (Mediator, M)                 | 2.593(2.348,2.863)***                                              | 2.461(2.227,2.720)***<br>0.849(0.827,0.871)*** | 8.7%                       |
| Combined parental TDP (Independent Variable,<br>X)                                   |                                                                    |                                                |                            |
| TDP mother and non-TDP father (D <sub>1</sub> )                                      | 2.245(2.056,2.451)***                                              | 2.160(1.977,2.359)***                          | 7.6%                       |
| Non-TDP mother and TDP father (D <sub>2</sub> )                                      | 1.918(1.718,2.141)***                                              | 1.864(1.669,2.082)***                          | 6.7%                       |
| TDP mother and TDP father (D <sub>3</sub> )<br>Gatherings <sup>a</sup> (Mediator, M) | 2.593(2.348,2.863)***                                              | 2.540(2.299,2.806)***<br>0.828(0.804,0.852)*** | 3.9%                       |
| Combined parental TDP (Independent Variable,<br>X)                                   |                                                                    |                                                |                            |
| TDP mother and non-TDP father (D <sub>1</sub> )                                      | 2.245(2.056,2.451)***                                              | 2.237(2.049,2.442)***                          | NS                         |
| Non-TDP mother and TDP father (D <sub>2</sub> )                                      | 1.918(1.718,2.141)***                                              | 1.915(1.715,2.138)***                          | NS                         |
| TDP mother and TDP father (D <sub>3</sub> )<br>Outdoor Activity (Mediator, M)        | 2.593(2.348,2.863)***                                              | 2.584(2.339,2.854)***<br>0.982(0.958,1.006)    | NS                         |

Adjusted for gender, child's age, child's migrant status, marital status, maternal age, maternal education, paternal age, paternal education.

\* P<0.05 \*\* P<0.01 \*\*\* P<0.001

0.000: The value was greater than 0 and less than 0.001, -0.000: The value was greater than -0.001 and less than 0.

<sup>a</sup> Gatherings refer to joining family and friends gatherings with child.

NS: not significant (the mediation effect is not significant, so the proportion of mediation is not shown).
